1        **“Sharing my story has been part of my healing process”:**

2                    **how Native women survivors heal from IPV**

3

4        Susanna Y Park<sup>1</sup>

5

6        <sup>1</sup>College of Public Health & Human Sciences, Oregon State University, Corvallis, OR

7        <sup>#a</sup>Current address: 1890 N Revere Ct, Aurora, CO, USA

8

9

10        \*Corresponding author:

11        E-mail: [syjpark@gmail.com](mailto:syjpark@gmail.com) (SP)

12

## 13 **Abstract**

14 Four out of five Native women experience intimate partner violence (IPV) in their lifetime.  
15 Culture, Native identity, and other socioeconomic factors influence how survivors experience  
16 seeking support and healing. High rates of IPV among Native women indicate an urgent public  
17 health need to address the long-term implications of being a survivor. This study explores how  
18 Native women in California seek healing as survivors of violence through stories shared in  
19 Community Circles and Oral Histories supported by collaborations with local Indigenous  
20 community organizations in Southern California. Seeking support and healing for Native women  
21 survivors of IPV are layered with their identities as Indigenous women, historical oppression,  
22 and its resulting intergenerational traumas. Healing from the violence has cultural implications,  
23 amplifying the need for community-based systems of support that are Indigenous-centered. For  
24 AIAN women survivors of IPV, healing transcends beyond their selves, extending to their  
25 families, tribal communities, and future generations. Culturally-rooted systems of support that  
26 cultivate Indigenous values of connection and healing are needed.

27

## 28 **Introduction**

29 American Indian/Alaska Native (AIAN) women experience high rates of violence [1–5],  
30 with intimate partner violence (IPV) being the most common type of violence they experience  
31 [2,6–8]. Nearly four out of five Native women experience IPV in their lifetime. Though data on  
32 violence against Indigenous women living on Native American reservation lands and urban  
33 settings are sparse, existing studies indicate that AIAN women are at a significantly higher risk  
34 of experiencing stalking (48.4%) and physical violence (55.5%) by an intimate partner in their  
35 lifetime than non-Hispanic White-only women [4,6,7]. In addition, AIAN women are  
36 significantly more likely to experience psychological aggression (66.4%) by an intimate partner  
37 in their lifetime in the past year [8]. Over two out of three AIAN women will experience sexual  
38 assault in their lifetime [3]. Qualitative research on the experiences of violence among AIAN  
39 women suggests that the level of physical violence is more severe for Native women compared  
40 to women belonging to other ethnic groups. Over 90% reported being physically assaulted and  
41 25% reported that their perpetrator used a weapon [6]. To compare with White women, 71%  
42 reported physical assault and 9% reported the use of a weapon [6,7].

43 Public health research thus far has focused on gathering prevalence data and identifying  
44 protective and risk factors to better tailor interventions. However, not much is known on the  
45 support-seeking behaviors among AIAN women; culturally rooted research on how AIAN  
46 women seek support as survivors is even more sparse. Programs addressing violence vary in  
47 scope: community education, health professionals training on treating victims of violence, and  
48 telephone helplines. Programs that are specifically created for Native communities are  
49 infrequent. IPV is linked to negative health outcomes, and can severely impact a woman's  
50 physical, mental, and emotional health [4,9]. It is also an issue that continues throughout the

51 lifespan, affecting women in all stages of life and occurring multiple times [10]. There is a clear  
52 need to address such impacts of IPV for AIAN women who are at significant risk of  
53 experiencing IPV.

54         Studies examining support-seeking behavior of women who experience IPV suggest that  
55 they are more likely to seek informal support (e.g. friends and family) than seek formal support  
56 (e.g. police or medical) [11–13]. If women perceive the violence as justified or engage in self-  
57 blaming behavior, they may be less likely to seek support [11]. Informal support may often lead  
58 to eventually seeking formal support. For instance, domestic violence survivors who sought  
59 informal support also decided to seek formal help if the family or friend they disclosed to had  
60 experienced or had knowledge of domestic violence [14]. For AIAN women, informal support is  
61 often protective if the family or social network is tight-knit, supportive, and affirming. However,  
62 if there is a risk of breaching confidentiality and lack of accountability [15], AIAN women are  
63 less likely to access informal networks for support and may seek formal support or not seek  
64 support at all [16].

65         This study aims to contribute to current understandings of how Native women survivors  
66 of IPV seek support through the lived experiences of survivors in California and learning about  
67 their journeys to find healing.

## 68 **Methods**

### 69 **Conceptual framework**

70         This study specifically draws from Burnette and Figley’s (2017) ecosystemic framework  
71 on historical oppression, resilience, and resistance. Historical oppression as a societal level risk  
72 factor for violence that permeates through other levels of the framework recognizes that IPV  
73 victimization transcends beyond individual-level impacts. The interconnectedness across

74 individual, family and relational, community and cultural, and societal levels is not only  
75 congruent to the Indigenous worldview but allows for a nuanced exploration of how survivors  
76 seek support [17–19].

77         The individual exists as part of an ecosystem that cannot be understood without the other  
78 levels [20]. Individual experiences with seeking support relate to family and relational factors,  
79 such as their parents, extended family, or friends. In most IPV cases, individuals tend to seek  
80 help from their informal networks [11–13]. However, individuals may further pursue seeking  
81 support from a formal network if their friends and family support them seeking professional help  
82 [15]. On the other hand, individuals may experience shaming from their informal network and  
83 choose to seek support from a formal network but advocate for themselves independently to see  
84 effect [21].

85         How attitudes and perceptions towards violence manifest at these levels are influenced by  
86 community and cultural factors, such as family values, community rules, or tribal traditions. In  
87 Native communities, a “tight-knit” community may serve as both a positive and negative factor  
88 to seeking help. Tight-knit communities can be a source of support and encourage the individual  
89 to seek help. On the other hand, the community may be so tight-knit that the individual may  
90 choose not to seek help in fear of their confidentiality being breached (Fiolet, Tarzia, Hameed, &  
91 Hegarty, 2019). Finally, societal factors like historical oppression play a critical role in informing  
92 the structures in which formal services can be accessed by survivors and the perversion of  
93 Indigenous values through colonial patriarchy that then permeates across multiple levels. For  
94 instance, the loss of “bodily sovereignty” not only through colonialism, but colonialism  
95 manifested through acts of violence against Indigenous women [22].

96 We expect to interpret the findings from this research using this framework. In doing so,  
97 the narratives of survivors are to be understood as existing within an ecosystem of interconnected  
98 levels. Survivor stories of seeking support and healing are in relative to their identity as  
99 Indigenous women, their culture and tribal communities, and their loved ones.

## 100 **Study methods**

101 Wilson (2008) uses the term “strategies of inquiry” to describe a process in Indigenous  
102 research in which a general direction for the research is strategized, allowing for flexibility and  
103 adaptation along the way. Rather than being confined to a list of methodological approaches, he  
104 uses a combination of methods that reflect Indigenous research values of “learning by watching  
105 and doing” [19]. In the same vein, this project drew from various qualitative methods to reflect  
106 Indigenous ways of knowing, relationship building, and relational accountability.

107 For a year, I engaged in participant observation through feminist critical ethnography, an  
108 ethnographic method in which structural inequities through the lenses of race, disability, gender,  
109 etc. are assumed to be divided hierarchically, therefore influencing how society functions and  
110 influences cultural groups [23]. The feminist lens centers the voices of AIAN women survivors,  
111 bound within the context of colonialism and patriarchy as oppressive structural constructions that  
112 shape the experiences of women. Contrary to realist ethnography where the researcher aims to  
113 remain value neutral and offers an interpretation of observations from the field, critical  
114 ethnography values the relationship built with the participants and intentionally recognizes the  
115 non-immunity to bias and researcher subjectivity [23,24]. Using feminist critical ethnography  
116 allowed me to observe and participate in such spaces with the assumption that people’s lived  
117 experiences are affected by oppressive structures of power and privilege [17,24,25].

118 Participant observation during this stage included attending various Indigenous  
119 community events, such as talking circles, pow wows, advocacy efforts for violence against  
120 Native women, and educational sessions (e.g., webinars) by Indigenous scholars. A journal was  
121 actively kept that reflected on such events, detailing my positionality relative to the event  
122 participants and cultural observations. In doing so, I fostered relationships with AIAN  
123 community members who work in service sectors, such as family housing, therapy, and medical  
124 care.

125 As I connected with community members and spoke with other Indigenous people about  
126 violence against Native women, community members facilitated my ability to connect with key  
127 individuals. Key community leaders in California were identified at two AIAN-centered  
128 organizations that provide mental and behavioral health services to Native people: Indigenous  
129 Circle of Wellness and Seven Generations Child and Family Services. I inquired with the  
130 community leaders if they would be willing to read a research brief to potentially collaborate on  
131 this research. Partnership was first established with the Indigenous Circle of Wellness, and it was  
132 the primary organization that supported the research direction. I met frequently with the  
133 Indigenous Circle of Wellness to discuss research methods, accountability, and information  
134 dissemination. The Indigenous Circle of Wellness and Seven Generations Child and Family  
135 Services were fundamental to the design and recruitment of participants for the study and  
136 mirrored the values of Indigenous methodologies that center the voices of participants in the  
137 study, are community-centered, and recognize that there are multiples ways of knowing (Smith,  
138 2013; Wilson, 2008).

139 Participatory observation field notes were unstructured. During the first year of  
140 connecting with community members and during data collection, field notes detailed the name,

141 date, and duration of event, and information on community members. Context of the event or  
142 interactions were noted, along with my positionality as a non-Native person, as a researcher, as a  
143 fellow person of color, and as a woman who experienced violence. Any learned cultural norms,  
144 processes, and terms were also noted. A separate document of reflections or memos were kept  
145 that detailed internal reflections of the my thoughts, emotions, questions, and connections made  
146 with other events [26].

### 147 **Ethics statement**

148 The study was approved by Oregon State University's Institutional Review Board (IRB-  
149 2020-0671). Verbal consent was obtained from all participants.

### 150 ***Relational accountability***

151 As a non-Indigenous scholar, I practiced reflexivity throughout the research process [27].  
152 This involved keeping a journal of expectations, reflections of values, and questions. In addition,  
153 I frequently met with partnered community leaders to discuss method development, results, and  
154 dissemination of findings. My positionality as a non-Indigenous academic researcher interacting  
155 with Native community members of academic and non-academic backgrounds was constantly  
156 examined to minimize reproducing colonial dynamics of harm imposed by academic institutions  
157 on Indigenous communities [28]. Discussions with community members often did not involve  
158 preconceived intentions of the research. Rather, community members were asked about their  
159 perspectives on issues of violence against AIAN women and what they perceived to be a need to  
160 prevent it.

161 Community leaders at the Indigenous Circle of Wellness and Seven Generations Child  
162 and Family Services supported and approved of the research direction. Principles of non-  
163 intrusive observation, deep listening with more than the ears, reflective non-judgmental



164 consideration, etc. were incorporated to ensure ethical responsibility and sensitivity [19]. The  
165 research direction and design were developed over multiple meetings in which community  
166 leaders emphasized the importance of creating a space that was Native centered in all stages of  
167 the research. For instance, “support-seeking” was used in place of “help-seeking” to reduce  
168 paternalistic assumptions that AIAN women need “help,” and highlight the agency of survivors  
169 in their decisions to seek support. Recruitment flyers and terminologies were examined for  
170 familiarity and relatability among Native communities. Instead of using “focus groups,”  
171 “Community Circles” was used as it was culturally appropriate and familiar to talking circles  
172 [19]. It was also a culturally appropriate way to seek input and enabled me to “view from below”  
173 rather than accentuating my positionality as an academic extracting information from a sub-  
174 group of people who are subject to the gaze of a researcher [23,29]. Further, a community leader  
175 from either partner organization, who are also mental health therapists, always attended a  
176 Community Circle session, increasing trust among community members and allowing me to be  
177 accepted and welcomed into the space.

### 178 ***Community Circles and Oral History***

179 Community Circles were formatted as talking circles for Indigenous women to gather and  
180 have an equal chance to speak and be heard. The general goal of Community Circles was for  
181 women to engage in the relational healing [30] and share their experiences on seeking support as  
182 survivors of IPV. This is different from focus group discussions, in which the researcher is  
183 looked upon as the main facilitator of the direction of the discussion. Rather, Community Circles  
184 as a familiar space enabled the participants to actively engage in discussing  
185 their experiences and easily apply talking circle processes of listening, sharing,  
186 and uplifting. I was introduced by the trusted community leader to the participants and a

187 community member would volunteer to open with a prayer. An overview of the project was  
188 presented along with a gift choice of a beading kit from a local Native artist or a \$25 gift card. At  
189 the end of the Community Circle, participants had the option of scheduling a separate one-on-  
190 one session with me to share their Oral Histories. Every Community Circle was attended by a  
191 professional Native mental health therapist as support.

192         Similar to Community Circles, Oral Histories were unstructured with the general goal of  
193 survivors sharing their experiences of seeking support. It was a dedicated space for AIAN  
194 women to tell their own stories. Oral Histories were conducted with Community Circle  
195 respondents due to me having established a relationship with the participant from a Community  
196 Circle session. This allowed for a trusted setting in which the participant shared details on their  
197 family history, childhood, healing processes, and aspirations for the future. Individual nuances of  
198 how they navigated various events in their life contributed to the larger understanding of why  
199 and how they sought support as survivors. Oral Histories are part of many Indigenous traditions  
200 in which language, culture, and relationships are preserved. However, each tribe has their unique  
201 language, identity, and cultural practices that cannot be essentialized. Oral Histories were used to  
202 emphasize the nuanced experiences of AIAN women survivors who come from different tribes,  
203 experiences, and family histories [31]. Participants in this study are from the following tribes:  
204 Bishop Paiute, Cahuilla, Chickasaw, Choctaw, Chumash, Comanche, Diné (Navajo), Ho Chunk,  
205 Mashpee Wampanoag, Menominee, Mvskoke, Nahua, Pechanga, Pueblo, Seminole, Seneca,  
206 Taos, and Tongva. Not all participants knew their tribal affiliations. This study provides a  
207 snapshot from the voices of those who shared their stories and cannot be essentialized.

## 208 *Sampling*

209 Four Community Circles and 10 Oral History interviews were completed. Community Circle  
210 participants were recruited via convenience sampling. Flyers for recruitment were distributed via  
211 the Indigenous Circle of Wellness and Seven Generations Child and Family Services' e-mail  
212 newsletter and on social media (e.g., Instagram, Facebook, and Twitter). Interested individuals  
213 were led to a web link to determine whether they met the eligibility criteria and confirm that they  
214 had access to a safe environment to participate. Eligibility criteria included individuals who:

- 215 - 18 to 64 years of age
- 216 - Self-identified as Indigenous and/or Alaska Native/American Indian
- 217 - Self-identified as a woman
- 218 - Experienced violence from an intimate partner

219 Community Circles were 90 to 120 minutes with four to eight participants and were  
220 conducted via Zoom due to COVID-19 safety restrictions. Participants were given the option to  
221 leave their camera off and contribute via the Zoom chat box. Several participants did interact  
222 with the group in this manner due to their children being present or because they felt  
223 uncomfortable showing their faces in a group setting.

224 Community Circles began with a community leader introducing me to the group. I presented  
225 a short introduction about myself and the research project. IPV was clearly defined to make  
226 explicit that multiple forms of violence can also be considered IPV. Participants were informed  
227 that they were not required to share details of their IPV experience. They were also provided  
228 with clear communication pathways to me, such as e-mail and phone. Updates on the progress of  
229 the research were sent out after each Community Circle and during analysis. Verbal consent was  
230 obtained from all participants and the session was audio recorded. After each Community Circle

231 session, an invitation to participate in an Oral History interview and a list of local and national  
232 resources were sent. Feedback was also solicited in the post-session e-mail and debriefs with the  
233 community leader present for the session were done immediately after the Community Circle  
234 ended.

235 Demographic information from Community Circle participants was not gathered to minimize  
236 replicating academic research settings and allow the participants to reveal as much information  
237 about themselves as they desired. To protect their confidentiality, their names and tribal  
238 affiliations will not be identified in the results.

239 A total of 10 Oral History interviews were conducted, nine of whom were recruited from  
240 Community Circles and one who was unable to attend a Community Circle but volunteered to  
241 share their Oral History. Oral Histories were semi-structured, focusing on the participant's  
242 background, their family history, and more details on their support-seeking decisions. Oral  
243 histories were two hours in length and conducted via Zoom due to COVID-19 restrictions.  
244 Participants were able to choose another \$25 gift in the form of a gift card or beading kit. Once  
245 verbal consent was obtained from the participant, the session was audio recorded.

246 Demographic information was collected in this setting as part of understanding the  
247 individual's oral history narrative. Table 1 provides a demographic summary of Oral History  
248 participants (n=10). Participants resided in both urban and reservations in California. Participant  
249 ages ranged from 30 to 51. Half of the participants identified as heterosexual, 20% as bisexual,  
250 10% as queer, and 10% as pansexual. For formal education, 60% of the participants obtained or  
251 were obtaining a graduate degree. Forty percent attended some college or trade school. Eighty  
252 percent of participants were employed at the time. As for marital status, 60% identified as single,  
253 10% as married, 20% as separated or divorced, and 10% as co-habiting. Finally, 30% of the

254 participants identified their ethnic background as Indigenous only and the remaining 70%  
255 identified as Indigenous and as other ethnicities.

256 Table 1. Demographic characteristics of Oral History participants

| <u>Demographic characteristics</u> | <u>Participants (n=10)</u> |
|------------------------------------|----------------------------|
| Age (average)                      | 37.3                       |
| <i>Sexual Orientation (%)</i>      |                            |
| Heterosexual                       | 50                         |
| Queer                              | 10                         |
| Bisexual                           | 20                         |
| Pansexual                          | 10                         |
| No Answer                          | 10                         |
| <i>Education (%)</i>               |                            |
| Some college or trade school       | 40                         |
| Bachelors                          | 0                          |
| Graduate                           | 60                         |
| Employed (%)                       | 80                         |
| <i>Marital Status (%)</i>          |                            |
| Married                            | 10                         |
| Single                             | 60                         |
| Separated or Divorced              | 20                         |
| Co-habiting                        | 10                         |
| <i>Ethnic background (%)</i>       |                            |
| Indigenous only                    | 30                         |
| Multi-ethnic                       | 70                         |

257  
258 Participants were notified that they could request transcripts of their Oral Histories. Two  
259 requested transcripts but there was no further feedback provided once the transcripts were  
260 received. At the conclusion of Community Circle and Oral History interviews, a community  
261 report with initial findings was distributed to all participants for review. The Indigenous Circle of  
262 Wellness and Seven Generations Child and Family Services approved the community report and  
263 three participants who engaged in a Community Circle and Oral History responded with positive  
264 feedback.

## 265 **Analysis**

266 Audio recordings were transcribed using Otter.ai transcription and transcripts were  
267 analyzed using MAXQDA software. All transcripts underwent initial *in vivo* coding to ground  
268 the analysis in the survivors' perspectives. Concepts that emerged from the *in vivo* coding  
269 process informed our results. Community Circle transcripts were analyzed separately from Oral  
270 Histories to observe whether similar codes and themes would emerge. Initial findings from the  
271 first round of coding and thematic analysis were compiled into a community report that was  
272 distributed to the community partners and participants for review. The second round of coding  
273 was completed based on community feedback. Participants resonated with stories of healing and  
274 the collective need for Native-only community spaces for survivors. Thus, the second round of  
275 coding revisited *in vivo* codes that included topics of healing and community and delineated how  
276 healing and community were characterized.

## 277 **Reliability**

278 As a non-Indigenous researcher representing an academic institution, every decision and  
279 interaction were done with intention and accountability. Once I was connected to key community  
280 leaders at Indigenous Circle of Wellness and Seven Generations Child and Family Services, I  
281 sent a research brief that detailed who I was beyond my academic identity. During initial  
282 meetings with community partners, I was asked what my connection was to California as I did  
283 not reside there at the time of this research and writing. We connected on my family's history as  
284 immigrants who first lived in California, and my childhood memories of traveling to California  
285 frequently to access Koreatown and have a semblance of home. As a first-generation US citizen,  
286 I grew up with a multicultural identity. This story carried on into Community Circles as I  
287 introduced the study to the participants. As an outsider, the women were interested in my

288 motivations and my connection to Native people (Smith, 2013). This project relied heavily on the  
289 community partners' feedback, and I frequently met with the community leaders from the  
290 Indigenous Circle of Wellness and Seven Generations Child and Family Services to reflect on  
291 Community Circles and implement any changes suggested by the participants. Member checking  
292 was prominent throughout the analysis phase to ensure that the developing themes reflected the  
293 voices and perspectives of the participants.

## 294 **Results**

295 Women used multiple strategies to seek support. Formal networks of support include  
296 therapy with a mental health professional, safe houses, medical care, housing services,  
297 community advocacy services, and law enforcement. Informal networks of support include loved  
298 ones, such as friends, family, and partners. While past studies have explored predictors of  
299 seeking support, we are further interested in the dynamic nature of seeking support over time,  
300 and the relationships between the different areas of support and with the survivor. Survivor  
301 stories in Community Circles and Oral History interviews reveal four salient relationships: 1)  
302 Informal support is entangled with intergenerational trauma and normalization within families;  
303 2) Some forms of formal support can be harmful to the survivor, therefore solidifying Indigenous  
304 survivors' mistrust in these institutions; and 3) Healing is found in ceremony; and 4) Support that  
305 is community-based and culturally informed is imperative for Indigenous survivors.

### 306 **Entanglements with informal support**

307 In many cases, friends and family are the first line of support that survivors seek out. As  
308 Native women, seeking support from family or their Indigenous community is complex. The  
309 ripple effects of colonization and genocide of Native peoples, and the subsequent  
310 intergenerational trauma that occurs is often a focal point when survivors reflect on their

311 histories of abuse. Thus, when family members respond by victim-blaming or normalizing the  
312 abusive relationship, this response is attributed to the normalization of family violence and  
313 intergenerational trauma that their families have experienced.

314         And I had moved into my grandmother's house to tell my Grandma what was  
315         happening. You know, what he was doing to me. And after I told her, she told me,  
316         well, "you made your bed now lay in it." (Community Circle 1)

317  
318 Nods of agreement or typed affirmations in the Zoom chat box followed as this survivor recalled  
319 her grandmother's response. One community member wrote, "*my mom said the same thing,*"  
320 further reflecting the depth in which the victim-blaming and normalization of IPV have passed  
321 through generations.

322         When you grow up, and there's a lot of sexual and physical violence present, and  
323         you're like, these hurt. This shouldn't be happening. And then people are telling  
324         you, "we do this anyway." You get such a distorted vision of the world and, and  
325         lots of times when I'm not feeling myself, I'm in my head spinning around in  
326         there...I don't have any kind of clarity. (Community Circle 1)

327  
328         Survivors will often reflect on their family and friends' responses that have fallen short.

329 In hindsight, many can rationalize reasons for why they were met with such reactions. For  
330 example, when one survivor was asked if she reached out to friends for support, she describes  
331 how her friends' lack of support could be attributed to the lack of information and education  
332 available then on how to support survivors.

333         They weren't dismissive, but it was, I suppose because they didn't know what to  
334         do. This was like in the late 90s, early 2000s. So there really wasn't this  
335         discussion of like, how to help survivors or what to do if someone comes to you.  
336         And this was like, you know, the internet just came about. (Oral History 4)

337  
338         Similar rationalizations are expressed regarding family members who have also  
339 responded to survivors in non-supportive ways. Particularly for family members that victim-  
340 blamed the survivor, the women recall the experience with an understanding of why their loved  
341 ones responded this way. Survivors acknowledge the complexity of trying to find healing within



342 the very family units that have experienced generations of systemic violence and have  
343 internalized victim-blaming behavior.

344 Just thinking Indigenous wise, and tribal wise, [it] really does take a village to  
345 raise anybody...I believe in that and I believe in the family because I've gotten so  
346 much support and healing from my family, I really have. But it's hard because it's  
347 kind of like trying to fix something with the thing that's broken. Like seeking  
348 support from the people who installed my buttons... it's hard to heal within that  
349 family unit. (Oral History 8)

350  
351 All the women in this study describe the role that violence played throughout their family  
352 as they recount generations of women who have also endured violent relationships. They often  
353 attribute the existing history of violence within their family in relationship to traumatic policies  
354 like being placed in boarding schools, the Dawes Act, etc.

355 Now, my grandmother was raised in boarding schools since she was three. She  
356 stayed there until she was 18. So, I believe that, even though she said that at that  
357 time, I took it to heart at that time. But now I realize that it was we talk about  
358 multi-generational trauma, that she didn't grow up in a loving family or even  
359 having the ability to show love or give love because it was never given to her.  
360 (Community Circle 1)

361  
362 While some family members, particularly mothers and grandmothers, may normalize IPV, the  
363 survivors themselves express a refusal to allow this "generational curse" to continue. This  
364 resolve is borne from more supportive interactions with loved ones. Friends, family, or partners  
365 can offer strong support to survivors as they navigate leaving their abusers and begin the  
366 recovery or healing process.

367 For one participant, an extended family member was crucial to her acknowledging the  
368 IPV in her relationship at the time. What distinguished this family member from others was their  
369 ability to name the abuse and "just [be] honest, just listening... [they weren't] there to judge."

370 I think that's when [family member] was a big thing because he never just told me  
371 to like leave or anything like that...He was just like, "it's domestic violence. I  
372 care about you." So, he'd take me out to dinner every now and then just to check

373 up on me. And it wasn't frustration. It was more like, "I just want to make sure  
374 you're okay." (Oral History 2)

375  
376 This survivor identifies her family member's support as being exemplary of love and patience  
377 that clarified the type of support the survivor needed. She mirrors the same kind of support she  
378 received from her family member to a friend experiencing IPV by extending grace and patience  
379 as opposed to pushing them to leave the relationship.

380 Another survivor describes her parents as being "bodyguards" as they directly intervened  
381 when her abuser tried to reach her. In one instance, while she tried to break up with her abuser,  
382 he forced himself into her home. The survivor called her mother, and the abuser took the phone  
383 from her. He claimed that she was suicidal and that he was going to take her to the emergency  
384 room to get checked in.

385 My mom was like, super cool, she's like "Oh, thanks for telling me. You don't  
386 need to take her to the hospital, I'll come home, I'll take her right now."  
387 Superconscious. "Give the phone to [survivor]." So, he hands me the phone, she's  
388 not on speaker anything. And she was like, "try and stay like in public. Don't be  
389 in the house alone with him. I'm coming home right now," and she just knew. She  
390 totally knew. (Oral History 3)

391  
392 Her father also served as a shield by refusing to let the abuser contact her. Her parents never  
393 questioned the validity of the abuse and were quick to protect their daughter from further  
394 interactions or potential harm from the abuser.

395 Such examples of seemingly unconditional support from loved ones for survivors were  
396 rare among the participants in this study. While we cannot postulate that this is representative  
397 across all Native women survivors, we observe patterns of support from loved ones, especially  
398 family, is intertwined with intergenerational trauma and violence.

## 399 **Inadequate outsider systems**

400           When support from loved ones is rife with victim-blaming or lack of acknowledgment,  
401 survivors have accessed other forms of support. Formal networks were often mentioned as  
402 emergent sources of support due to feeling endangered or because the survivor needed  
403 immediate attention from a violent interaction.

404           Law enforcement is especially regarded among the survivors as an untrustworthy source.  
405 Some have contemplated reporting or seeking a restraining order, but their mental map of what  
406 would accumulate often leads to exhaustion and doubt that police will be a beneficial resource.

407           I really wanted to get a restraining order, but it was so much exhaustion of what I  
408 was doing where I didn't want to get that restraining order because I have to talk  
409 about you know, everything he does to me mentally and then also physically and I  
410 had- something I didn't want to really relive. And it's something that I don't think  
411 police, men, or even the police system, in general, would believe me.  
412 (Community Circle 1)

413  
414           Multiple women in the study recall moments where they were put in handcuffs or blamed by  
415 judicial authorities. Across all the women in this study, none sought out police willingly as a  
416 primary source of support. Rather, their interactions with the police were often a result of the  
417 abuser using law enforcement as a tool to control or coerce the women.

418           I never have trusted the cops ever. My whole life I've never trusted the police so that  
419 was definitely not a safe place. Oddly enough, he called the police on me one time  
420 when I was telling him that I was gonna leave. He called the cops and told them that I  
421 was having a psychotic break and I had threatened him, so they came into my home,  
422 put handcuffs on me. (Oral History 9)

423  
424           For some women, even when they are no longer in an intimate relationship with the abuser,  
425 the abuser continues to manipulate or harass them. Survivors describe how ex-partners will use  
426 their children as pawns to harass and abuse the survivor. In other cases, ex-partners will continue  
427 to stalk the survivor. Such chronic exposure to violence from an intimate partner unfairly

428 burdens the survivor to then manage their safety and boundaries, all the while they are trying to  
429 heal from the traumatic experience.

430 And it's a way that he kind of still controls me to this day and, and I want to delete all  
431 of like, I mean, I have fucking hundreds of pages of just, "He didn't show up at this  
432 time. Then he came two days later and he screamed and yelled about this and then did  
433 just all this stuff." And it's so crazy-making, like they really asked me to just like sit  
434 in it, to be so fully, fully consumed with that relationship. How the hell are you  
435 supposed to heal or like move on to anything else? (Oral History 5).

436  
437 Another survivor who is also a mother recalls how her ex-partner also uses law enforcement  
438 and judicial courts to his advantage. In their disputes regarding their children, the abuser will  
439 continue to take her to a court or even call the police on her to obtain his objective. One incident  
440 involved the abuser calling the police on the mother while their children were staying with her.

441 I had the kids [and] he thought he should have them. But it wasn't his time. And I told  
442 him not to come, that I wasn't gonna release the children... I was within my rights.  
443 And he came anyway and knocked on my door. And I was like, "I'm not releasing the  
444 children." Then he brought the police. And there was nothing the police could do  
445 either.

446  
447 When the police came, the way they appeared gave her the impression that they saw her as the  
448 perpetrator.

449 ...they came in two separate police cars and they were both wearing flak jackets. I  
450 was thinking he must have told them the kids are in danger or something like very  
451 serious...they came like within five minutes... They don't normally wear flak jackets  
452 around [here] and [he] must have portrayed it as some kind of dangerous domestic  
453 dispute.

454  
455 As she reflected on this incident, she continued to discuss how her ex-partner's decision to call  
456 the police reflects his disregard for their children's safety. Rather, it was an act of exerting power  
457 by mobilizing law enforcement against her.

458 And afterward... [my youngest child] was terrified, because the policeman was so big  
459 and white and mom was so small and brown, and he was sure the policeman was  
460 gonna shoot into the house or shoot me or something. But like, [x] didn't even  
461 consider like, how does this affect my kids, but call the police on my ex-wife, on their

462 mom, who's there in the house with them? So, I don't think he even thinks about  
463 those kinds of things. (Oral History 6)

464  
465 Just as many individual Native women express distrust in the police, the relationship between  
466 Native communities and law enforcement are entangled in the survivor's decision to call the  
467 police. For example, one woman shared how her reservation has an unspoken rule to not call the  
468 police. However, her decision to call ultimately stemmed from the need to have something on  
469 record to benefit her case for custody of her child in the future.

470 So when the police came looking for him, and they were questioning people, there  
471 were women who actually called my husband at the time and told him that, "you  
472 better look out because the police came looking for you," and everything like that.  
473 He could have killed me... It was a terrible situation...I wish there was somebody  
474 else I could have called besides the police to help me out, you know, I wish that  
475 there was something else that I could have done. (Community Circle 1)

476  
477 Inherent mistrust from the community entangled with the need to find protection for the  
478 family led to the reservation community and the outside legal system harming the survivor. This  
479 survivor's relationship with her community positioned her at the crosshairs of breaking her  
480 community's "rule" versus prioritizing her and her child's safety by seeking the only legal source  
481 available. None of the women in this study recall their relationship to law enforcement and  
482 judicial services as supportive. Rather, while it symbolically may serve as an institution of  
483 protection, it is regarded with intense mistrust and unreliability in supporting survivors of IPV.

## 484 **Healing is ceremony**

485 In both Community Circles and Oral History interviews, the women were asked about  
486 what healing meant to them, what worked, and what they wished was available to fellow  
487 Indigenous women survivors of IPV. Survivors in this study primarily sought healing in  
488 Indigenous-specific formal services (e.g. therapy) and community. Healing is often described in  
489 settings of the ceremony, such as engaging in an intimate process with the tribal community:

490 “You spend a year preparing... the initial ceremony where you go to ask for  
491 help... You have to bring offerings, you have to bring food, you have to like, do  
492 all these protocols, but then you also have to speak and tell the medicine man your  
493 reasons.” (Oral History 6)

494  
495 Ceremony with tribal elders is described as a way for survivors to reconnect with their roots:

496 And so when I go see elders and I do the ceremony, or I do different things, it helps me  
497 kind of find like my roots again so that I’m not just spinning around. (Oral History 5)

498  
499 Survivors have also engaged in ceremonies alone. Particularly for those that have been  
500 estranged from their tribes or Indigenous history, reconnecting with their ancestors’ traditions  
501 was foundational to their healing process. One participant describes using salvia, a sacred plant  
502 used by her people in ceremony “that calls your heart back into place.”

503 So I went through the ceremony. And I actually felt my ancestors, like standing  
504 beside me, like I felt their hands like on my shoulder, and it was a particularly,  
505 just healing and moving experience. I felt the beat, like their heartbeat, and our  
506 hearts just beat as one...for the first time in my life. I felt whole, I felt at peace.  
507 And so, being given that medicine was just a particularly healing and life-  
508 changing moment. (Oral History 4)

509  
510 Beading was frequently mentioned in both Community Circles and Oral History interviews as  
511 integral to their healing. Beading serves a meaningful purpose as it connects Natives to their  
512 culture and history, and are used to create or decorate jewelry, clothing, or regalia. Beadwork  
513 tells stories and is intimately valued [32]. For one survivor, she describes how people encourage  
514 her to sell her beadwork, but she does not see it for its monetary value: Any type of beading is  
515 medicine... It’s what I have overcome, I mean beading has helped me...it’s my medicine.  
516 (Community Circle 4)

517 It is also a vehicle for collective bonding that Native people can engage in. While each  
518 tribe may have its own significant meanings behind their beadwork, tribes like the Choctaw,  
519 Seneca, Chickasaw, Tongva, Cherokee, Diné, etc. share this spiritual tradition. Thus, beading  
520 with other Native members in the community can serve as a healing space.

521 ...you go into that circle, you're all working on your own projects, it could be  
522 completely silent. And it's just nice to sit there with other people and nobody's  
523 like hashing out these big life secrets, or, like these intense traumas, but it's just  
524 that it's like an extended family, you know, that's just super supportive. And it's  
525 all there with love in our hearts for everybody. (Oral History 3)

526  
527 Due to most of the participants having been recruited through community partners that provide  
528 mental health services, it was unsurprising to learn that most of the women had sought or are  
529 seeking therapy. In many ways, therapy or support groups were crucial to their healing journeys,  
530 especially if the therapist was Indigenous. One survivor listed the identities of her therapist that  
531 were particularly impactful for her:

532 Yeah, so fit for me was one: she identified as Native. That was really huge for me.  
533 And not only Native, but also Xicana as well, because I come from that  
534 household, you know, my dad is Mexican. And then being just also Native was  
535 really important. And being a woman was really important. (Oral History 2)

536  
537 It further served as an avenue for survivors to come to recognize and label the various acts of  
538 violence they experienced throughout their life. Particularly for those who witness violence  
539 throughout their upbringing, and it was normalized, therapy was pivotal to shifting their  
540 understandings of what violence could look like.

541 But going to therapy was a really big eye-opener to recognize the kind of pathway  
542 that I went by accepting violence in my life. (Oral History 2)

543  
544 Therapy, when culturally centered on Indigenous identity, carved a space for survivors to not  
545 only connect to their roots but process their traumas in a way that they could understand from  
546 their Indigenous world views. When asked about the difference between Indigenous and non-  
547 Indigenous support groups, one survivor shares:

548 I feel that in an indigenous way, it's more personal, more connected to the creator.  
549 And I think that's why I had to go more indigenous because there are more  
550 teachings on... creator and how things work together in a full circle." (Oral  
551 History 10)

552

553 It also has its mental health benefits as survivors work through their traumas, they feel  
554 more empowered to connect deeper with their communities and branch out to other forms of  
555 support to aid in their healing processes. For instance, one survivor shared during her  
556 Community Circle session that once she was able to find the strength to do therapy and yoga, she  
557 was “able to rebuild her community through reconnecting to other Indigenous people.”  
558 Broadening her connections and methods of support catalyzed her ability to rebuild “little  
559 pockets of communities.” (Community Circle 3)

## 560 **Culturally competent and community-based systems of support**

561 Survivors in both Community Circles and Oral History interviews were asked what was  
562 needed for Indigenous women survivors and community members. Regardless of tribal  
563 affiliations, age, or occupation, they all expressed the urgent need for culturally based services  
564 that catered specifically to Indigenous women.

565 And then participating in culturally based interventions strengthen our  
566 connections. So, for us as Native people, the culture and then coming together like  
567 this is an important part of our culture, right, is that connection with each other.  
568 So, it’s just great to hear, feeling as well, and you know making sure that it’s not  
569 passed on from generation to generation. (Community Circle 4)

570  
571 But also too, while engaging in, in like, interaction, like, even if it’s a group  
572 setting or therapy setting, to have more my cultural elements there. Because as I  
573 know that, you know, domestic violence isn’t traditional, yet what I talked about  
574 multi-generational trauma, it exists, it’s there. (Community Circle 1)

575  
576 To be able to access formal services, such as therapy, in settings where there is immediate  
577 cultural connection strengthens community ties. Further, being able to engage in environments  
578 where identities and traumas do not have to be elaborately explained may provide survivors  
579 some respite, opening space to focus on fostering a connection to their traditions and healing.



580 For Native women who are estranged from their tribal history, seeking connection to their  
581 roots is often painful and isolating. One woman recalls how she desperately cried out to her  
582 ancestors:

583 “I don’t even know exactly who you are, I really need your help.” And I would  
584 just go and sit in nature and sit by a tree and cry and that was how I got through it.  
585 (Oral History 9)

586  
587 Investing in culturally competent and community-based services allows for women to reclaim  
588 their bodily sovereignty [22]. Beyond healing from the trauma at physical, emotional, and  
589 psychological levels, healing that is culturally centered allows Indigenous women to pursue  
590 healing as symbolizing resistance to the societal level of historical oppression and resulting  
591 intergenerational violence.

592 For Native women to have the power and the strength, and the support, we need  
593 to be able to reclaim our sovereignty over our spirits and our bodies and the same  
594 way that many of us advocate for reclaiming the sovereignty of our tribes. (Oral  
595 History 5)

596  
597 The ability for survivors to reclaim their sovereignty for themselves has a direct impact on their  
598 relationships. Among the participants who are mothers, they are determined to reclaim their  
599 traditions by breaking the cycle of violence for the sake of their children.

600 Like we don’t, you know, they say, like one of the Native women’s orgs that I  
601 work with say, you know, violence against women is not traditional. You know,  
602 and there may be people, in our communities, in our Native communities that tell  
603 us it is, you know, or that would like us to believe otherwise. (Oral History 5)

604  
605 I want to stop by that cycle, and it has to start with me...I believe it’s a  
606 generational curse and until somebody stands up and stops it, it will continue.  
607 (Community Circle 4).

608  
609 To seek support and have access to culturally rooted support systems have significance  
610 that impacts beyond the individual level. Rather, survivors invoke the impact that their

611 healing will have on their relatives and community, breaking the cycle of violence for  
612 future generations.

## 613 **Discussion**

614  
615 Survivors have dynamic journeys as they pursue healing from their IPV experiences.  
616 While their paths to finding support may look different from person to person there are apparent  
617 commonalities among all women who participated in the Community Circles and Oral Histories.  
618 The first two themes discuss the complex relationships between survivors and informal and  
619 formal support systems. The latter two themes highlight how healing and support is actualized or  
620 imagined by the survivors. Among the Community Circles and Oral History participants, seeking  
621 informal support from a friend or family member is frequently mentioned. While this was an  
622 expected outcome [11–13], this study allowed for a deeper understanding of how informal  
623 support manifested throughout the survivors' lives. Participants who are younger or experienced  
624 violence more recently discussed how social media posts validated their experiences and  
625 reminded to seek out resources when needed. Normalization and victim-blaming behavior is  
626 observed in families, often among women whose mothers or grandmothers also experienced IPV  
627 in their lifetimes. On the other hand, when family members are supportive and validate the  
628 experience, the survivors credit such responses to their decision to seek formal support (e.g.  
629 therapy) later on [14].

630 All participants in the study regard law enforcement and the legal system as  
631 untrustworthy sources of support. Seeking support from the police is often due to increased risk  
632 of violence [11,16,33] and/or to protect their children from the abuser [34]. Police interactions  
633 with survivors reveal victim-blaming behavior as police will handcuff the survivor or further the  
634 trauma by requiring the women to recall in detail the violent incidents. The legal system is an

635 additional stressor as abusers wield it to control and manipulate the women even after separation.  
636 While abusers continue to utilize law enforcement and the legal system in their favor, the women  
637 grapple with how to heal from the relationship and find safety for themselves and their children.  
638 The need to continue to record all abusive interactions while actively protecting their children  
639 result in feelings of exhaustion, anger, and frustration. For one woman in Community Circle 1  
640 who shared that the women in her community warned her abuser about the police coming is  
641 exemplary of a tight-knit community that can act as a barrier to seeking formal support. This  
642 woman's decision to call the police was not primarily motivated by trust, but the need to have  
643 something on record to fight for custody of her child. However, her tight-knit community  
644 setting's deep mistrust in the police exacerbated the woman's risk of experiencing violence.  
645 Mistrust in the overall legal system permeates the institutional, community, and individual levels  
646 as women weigh their decision to call the police or go to court.

647 Informal and formal support systems can be harmful and inadequate in meeting the  
648 survivors needs. When asked about how they pursue healing and what a supportive system looks  
649 like, ceremony and culturally rooted systems of support are frequently mentioned. To engage in  
650 healing as ceremony is unique to Indigenous women as it is culturally specific and an unmet  
651 need among Native women survivors. As a population that has significantly high risk of  
652 experiencing IPV and are significantly more likely to lack access to needed services than non-  
653 Hispanic White women (Rosay, 2016), healing from IPV is an arduous and, sometimes, a self-  
654 guided process. Ceremony with their relatives and tribal members can be exemplary of a  
655 supportive tight-knit community in which survivors can engage in ceremony with a community  
656 healer or through beading circles. Communal healing spaces that are safe and specific to Native  
657 women allows the women to connect with each other not only as survivors of IPV, but as fellow

658 Indigenous women, as mothers, as daughters, and as extended relatives. For some women who  
659 participated in the Community Circles, this was the first time they had been in a protected space  
660 only for Native women survivors. After the Community Circles ended, participants asked when  
661 they could participate in the next one and expressed their desire to engage in more spaces like the  
662 Community Circle as it was particularly healing to share and collectively bond with other  
663 survivors. One woman described how it felt “effortless” by being able to show up and not feel  
664 burdened to explain how IPV is intertwined with her Indigenous identity.

665 Support systems that can transcend beyond the individual and strengthen the community  
666 and institutional levels are critical for Native women survivors. Continued education and  
667 outreach to individuals and community members on IPV is important but having information that  
668 is specific to Native people is imperative to fighting public health’s history of pushing AIANs to  
669 the margins of public health research and interest. Community Circles are exemplary of a  
670 protected space that permeates through all levels of the ecosystemic framework. It is a  
671 community setting in which individuals can participate in. Each Circle had a professional  
672 Indigenous mental health therapist present from one of the partner organizations. Institutional  
673 representation that is Indigenous and culturally rooted increases trust among survivors as well.  
674 Therefore, support for AIAN women survivors of IPV must be robust in empowering their  
675 cultural identities and increasing the availability of community-centered support systems.

## 676 **Limitations**

677 COVID-19 restrictions prevented in-person Community Circles and Oral History  
678 interviews. This had its benefits as women who may not have had the courage to share their  
679 stories in person felt more comfortable attending a Community Circle and participating with  
680 their videos off. However, occasional audio and connection challenges did occur.

681 Most participants discuss seeking mental health support as part of their healing journeys.  
682 While this was expected due to the nature of recruitment, this may not be representative of the  
683 many other Indigenous women across the Americas who have experienced IPV. Among Oral  
684 History participants, 60% of the women have graduate degrees. This is not representative of the  
685 larger AIAN population. Higher levels of educational attainment is associated with support-  
686 seeking behaviors [11,33]. Whereas most of the women in Community Circles do not have  
687 graduate degrees, those who further opted in to share their Oral Histories may be partially  
688 attributed to their education status. In addition, these women were also familiar with therapy and  
689 demonstrated the ability to speak on their experiences more cohesively. Despite their  
690 involvement with therapy and their healing journeys, gaps in adequate and culturally rooted  
691 support was evident. This may indicate that we are underestimating the impact of IPV and need  
692 for safe healing spaces for those who do not have a graduate degree or are not connected to  
693 Indigenous institutions like Indigenous Circle of Wellness and Seven Generations Child and  
694 Family Services. The community partners are in urban California cities and the experiences of  
695 the participants in this study do not wholly represent the experiences of those who have lived or  
696 currently live on reservations.

697 The method of this research utilizes a more participatory approach in which the  
698 researcher engages with the community. In doing so, the relationship between the researcher and  
699 the participants is unique. The researcher in this study does not identify as Indigenous which may  
700 result in limited understandings or incomplete interpretation of data. A collaborative approach  
701 and significant support from Native community leaders was critical to ensure relational  
702 accountability and rigor of the research.

703 Possible future research includes doing a closer follow-up with the participants to garner  
704 feedback on study processes and findings, or increasing feedback received when sharing  
705 transcripts and results with the participants. Women in this study often connected their Native  
706 identities and tribal histories to their experiences of seeking support. Harmful governmental  
707 policies like the Dawes Act and previous generations' survivorship from boarding schools have  
708 shaped the family's understanding of violence. The impact of such policies aiding and  
709 perpetuating dysfunctional family perceptions on IPV needs to be further pursued. Lastly,  
710 targeting recruitment to include not only those who identified as women but also as two-spirit  
711 introduces diversity of identities and experiences as survivors of IPV.

## 712 **Conclusion**

713 Violence against Indigenous women is an issue that affects survivors physically,  
714 mentally, emotionally, and spiritually. Intertwined with histories of oppression and colonization,  
715 historical oppression is often an essential component to understanding IPV among AIANs [5,35–  
716 37]. The concept of “soul wounds” is an Indigenous paradigm for various physical, mental, and  
717 emotional effects of violence. For AIAN women, experiencing and healing from violence is a  
718 laborious process as the resulting trauma can have intergenerational effects that perpetuate a  
719 cycle of violence within their families [38].

720 Navigating a world where there is a persistent lack of funding for culturally competent  
721 services, fear of medical and legal personnel not being sympathetic towards Natives due to  
722 misperceptions, stereotypes, and prejudice are all factors that make combating the issue of  
723 violence against Native women even more difficult [37]. Seeking support and healing for Native  
724 women survivors of IPV is layered with their identities as Indigenous women, historical  
725 oppression, and its resulting intergenerational traumas. Healing from the violence has cultural

726 implications, amplifying the need for community-based systems of support that are Indigenous-  
727 centered. For AIAN women survivors of IPV, healing transcends beyond their selves, extending  
728 to their families, tribal communities, and future generations. As one participant described: *I am*  
729 *the newest branch of a tree that is ancient.* (Oral History 3)

730

## 731 **Acknowledgements**

732 My deepest gratitude to the women who shared their stories so powerfully. I thank Monique  
733 Castro, LMFT from the Indigenous Circle of Wellness and Dr. Carrie Johnson from Seven  
734 Generations Child & Family Services for their support.

735

## 736 **References**

- 737 1. Echo-Hawk A. Our Bodies, Our Stories: Sexual Violence Among Native Women in Seattle,  
738 WA [Internet]. Urban Indian Health Institute; 2018. Available from:  
739 [http://www.uihi.org/wp-content/uploads/2018/08/UIHI\\_sexual-](http://www.uihi.org/wp-content/uploads/2018/08/UIHI_sexual-violence_r601_pagesFINAL.pdf)  
740 [violence\\_r601\\_pagesFINAL.pdf](http://www.uihi.org/wp-content/uploads/2018/08/UIHI_sexual-violence_r601_pagesFINAL.pdf)
- 741 2. Evans-Campbell T, Lindhorst T, Huang B, Walters KL. Interpersonal Violence in the Lives  
742 of Urban American Indian and Alaska Native Women: Implications for Health, Mental  
743 Health, and Help-Seeking. *Am J Public Health*. 2006 Aug;96(8):1416–22.
- 744 3. Tjaden P, Thoennes N. Full Report of the Prevalence, Incidence, and Consequences of  
745 Violence Against Women: (514172006-001) [Internet]. American Psychological  
746 Association; 2000 [cited 2020 Jan 17]. Available from: [http://doi.apa.org/get-pe-](http://doi.apa.org/get-pe-doi.cfm?doi=10.1037/e514172006-001)  
747 [doi.cfm?doi=10.1037/e514172006-001](http://doi.apa.org/get-pe-doi.cfm?doi=10.1037/e514172006-001)
- 748 4. Wahab S, Olson L. Intimate Partner Violence and Sexual Assault in Native American  
749 Communities. *Trauma Violence Abuse*. 2004 Oct 1;5(4):353–66.
- 750 5. Walters KL, Simoni JM. Reconceptualizing Native Women’s Health: An “Indigenist”  
751 Stress-Coping Model. *Am J Public Health*. 2002 Apr;92(4):520–4.
- 752 6. Bachman R, Zaykowski H, Lanier C, Poteyeva M, Kallmyer R. Estimating the Magnitude  
753 of Rape and Sexual Assault Against American Indian and Alaska Native (AIAN) Women.  
754 *Aust N Z J Criminol*. 2010 Aug 1;43(2):199–222.
- 755 7. Deer S. *The beginning and end of rape: confronting sexual violence in native America*.  
756 Minneapolis: University of Minnesota Press; 2015. 207 p.
- 757 8. Rosay AB. *Violence Against American Indian and Alaska Native Women and Men*. 2016  
758 Sep;8.
- 759 9. Walters KL, Simoni JM. Decolonizing Strategies for Mentoring American Indians and  
760 Alaska Natives in HIV and Mental Health Research. *Am J Public Health*. 2009 Apr  
761 1;99(S1):S71–6.



- 762 10. CDC. Preventing Intimate Partner Violence [Internet]. CDC. 2019 [cited 2019 Dec 7].  
763 Available from:  
764 <https://www.cdc.gov/violenceprevention/intimatepartnerviolence/fastfact.html>
- 765 11. Goodson A, Hayes BE. Help-Seeking Behaviors of Intimate Partner Violence Victims: A  
766 Cross-National Analysis in Developing Nations. *J Interpers Violence*. 2018 Aug  
767 23;0886260518794508.
- 768 12. Gover AR, Tomsich EA, Richards TN. Victimization and Help-Seeking Among Survivors  
769 of Intimate Partner Violence. 2015 Mar 4 [cited 2019 Nov 22]; Available from:  
770 [https://www.oxfordhandbooks.com/view/10.1093/oxfordhb/9780199935383.001.0001/oxfo](https://www.oxfordhandbooks.com/view/10.1093/oxfordhb/9780199935383.001.0001/oxfordhb-9780199935383-e-58)  
771 [rdhb-9780199935383-e-58](https://www.oxfordhandbooks.com/view/10.1093/oxfordhb/9780199935383.001.0001/oxfordhb-9780199935383-e-58)
- 772 13. Kim E, Hogge I. Intimate Partner Violence among Asian Indian Women in the United  
773 States: Recognition of Abuse and Help-Seeking Attitudes. *Int J Ment Health*. 2015 Jul  
774 3;44(3):200–14.
- 775 14. Evans MA, Feder GS. Help-seeking amongst women survivors of domestic violence: a  
776 qualitative study of pathways towards formal and informal support. *Health Expect*.  
777 2016;19(1):62–73.
- 778 15. Burnette CE. Family and cultural protective factors as the bedrock of resilience and growth  
779 for Indigenous women who have experienced violence. *J Fam Soc Work*. 2018 Jan  
780 1;21(1):45–62.
- 781 16. Spencer RA, Shahrouri M, Halasa L, Khalaf I, Clark CJ. Women’s Help Seeking for  
782 Intimate Partner Violence in Jordan. *Health Care Women Int*. 2014 Apr 3;35(4):380–99.
- 783 17. Burnette CE, Figley CR. Historical Oppression, Resilience, and Transcendence: Can a  
784 Holistic Framework Help Explain Violence Experienced by Indigenous People? *Soc Work*.  
785 2017 Jan 1;62(1):37–44.
- 786 18. Odom SK, Jackson P, Derauf D, Inada MK, Aoki AH. Piliñahā: An Indigenous Framework  
787 for Health. *Curr Dev Nutr*. 2019 Feb 22;3(Suppl 2):32–8.
- 788 19. Wilson S. *Research is Ceremony: Indigenous Research Methods*. Black Point, N.S:  
789 Fernwood Pub; 2008. 123 p.
- 790 20. Duran E, Duran B. *Native American postcolonial psychology*. Albany: State University of  
791 New York Press; 1995. 227 p. (SUNY series in transpersonal and humanistic psychology).
- 792 21. Mookerjee S, Cerulli C, Fernandez ID, Chin NP. Do Hispanic and Non-Hispanic Women  
793 Survivors of Intimate Partner Violence Differ in Regards to Their Help-Seeking? A  
794 Qualitative Study. *J Fam Violence*. 2015 Oct 1;30(7):839–51.
- 795 22. Deer S. Sovereignty of the Soul: Exploring the Intersection of Rape Law Reform and  
796 Federal Indian Law. *SUFFOLK Univ LAW Rev*. 2005;12.

- 797 23. Skeggs B. Feminist Ethnography. In: Handbook of Ethnography [Internet]. 1 Oliver's  
798 Yard, 55 City Road, London England EC1Y 1SP United Kingdom: SAGE Publications Ltd;  
799 2001 [cited 2022 Feb 18]. p. 426–42. Available from:  
800 <http://methods.sagepub.com/book/handbook-of-ethnography/n29.xml>
- 801 24. Bhattacharya K. Fundamentals of qualitative research: a practical guide. New York:  
802 Routledge, Taylor & Francis Group; 2017. 204 p.
- 803 25. Burnette CE. From the Ground Up: Indigenous Women's after Violence Experiences with  
804 the Formal Service System in the United States. *Br J Soc Work*. 2015 Jul 1;45(5):1526–45.
- 805 26. Schubotz D. Participatory Research: Why and How to Involve People in Research  
806 [Internet]. 1 Oliver's Yard, 55 City Road London EC1Y 1SP: SAGE Publications Ltd; 2020  
807 [cited 2022 Feb 19]. Available from: [https://methods.sagepub.com/book/participatory-](https://methods.sagepub.com/book/participatory-research)  
808 [research](https://methods.sagepub.com/book/participatory-research)
- 809 27. Aronowitz R, Deener A, Keene D, Schnittker J, Tach L. Cultural Reflexivity in Health  
810 Research and Practice. *Am J Public Health*. 2015 Jul;105(Suppl 3):S403–8.
- 811 28. Smith LT. Decolonizing methodologies: research and indigenous peoples. Second edition.  
812 London & New: Zed Books; 2012. 240 p.
- 813 29. hooks bell. Talking back: thinking feminist, thinking black. Boston, MA: South End Press;  
814 1989. 184 p.
- 815 30. Mehl-Madrona L. Healing relational trauma through relational means: aboriginal  
816 approaches. In: Potter N, editor. Trauma, Truth and Reconciliation [Internet]. Oxford  
817 University Press; 2006 [cited 2022 Feb 1]. p. 277–98. Available from:  
818 [http://oxfordmedicine.com/view/10.1093/med/9780198569435.001.0001/med-](http://oxfordmedicine.com/view/10.1093/med/9780198569435.001.0001/med-9780198569435-chapter-012)  
819 [9780198569435-chapter-012](http://oxfordmedicine.com/view/10.1093/med/9780198569435.001.0001/med-9780198569435-chapter-012)
- 820 31. Mahuika N. Rethinking Oral History and Tradition: An Indigenous Perspective [Internet].  
821 1st ed. Oxford University Press; 2019 [cited 2022 Feb 19]. Available from:  
822 [https://oxford.universitypressscholarship.com/view/10.1093/oso/9780190681685.001.0001/](https://oxford.universitypressscholarship.com/view/10.1093/oso/9780190681685.001.0001/oso-9780190681685)  
823 [oso-9780190681685](https://oxford.universitypressscholarship.com/view/10.1093/oso/9780190681685.001.0001/oso-9780190681685)
- 824 32. Gray MJ. Beads: Symbols of Indigenous Cultural Resilience and Value. 2017;51.
- 825 33. Tenkorang EY, Sedziafa AP, Owusu AY. Does Type and Severity of Violence Affect the  
826 Help-Seeking Behaviors of Victims of Intimate Partner Violence in Nigeria? *J Fam Issues*.  
827 2017 Oct 1;38(14):2026–46.
- 828 34. Rasool S. Help-Seeking After Domestic Violence: The Critical Role of Children. *J Interpers*  
829 *Violence*. 2016 May 1;31(9):1661–86.
- 830 35. Razack SH. Sexualized Violence and Colonialism: Reflections on the Inquiry into Missing  
831 and Murdered Indigenous Women. *Can J Women Law* [Internet]. 2016 Aug 18 [cited 2019  
832 Dec 6]; Available from: <https://www.utpjournals.press/doi/abs/10.3138/cjwl.28.2.i>

- 833 36. Sotero M. A Conceptual Model of Historical Trauma: Implications for Public Health  
834 Practice and Research [Internet]. Rochester, NY: Social Science Research Network; 2006  
835 Fall [cited 2019 Dec 11]. Report No.: ID 1350062. Available from:  
836 <https://papers.ssrn.com/abstract=1350062>
- 837 37. Weaver HN. The Colonial Context of Violence: Reflections on Violence in the Lives of  
838 Native American Women. *J Interpers Violence*. 2009 Sep 1;24(9):1552–63.
- 839 38. Mercy JA, Rosenberg ML, Powell KE, Broome CV, Roper WL. Public health policy for  
840 preventing violence. *Health Aff Proj Hope*. 1993;12(4):7–29.

841
